# Supplementary material
Source: Royal Society of Chemistry journal article supplement (doi:10.1039/d6nr00890a)
Supplement: d6nr00890a1.pdf [file d6nr00890a1.pdf]

## The Rh-In bimetallic nanoparticles formation regularities: insights from theoretical and experimental studies by XPS and STM

Alexander O. Martyanov,<sup>a</sup> Maxim A. Panafidin,\*<sup>b</sup> Andrey V. Bukhtiyarov,<sup>b</sup> Igor P. Prosvirin,<sup>b</sup> Yan V. Zubavichus,<sup>a</sup> and Valerii I. Bukhtiyarov<sup>b</sup>

<sup>a</sup> *Synchrotron Radiation Facility SKIF, Boreskov Institute of Catalysis, Nikolsky ave. 1, 630559 Kol'tsovo, Russia*

<sup>b</sup> *Boreskov Institute of Catalysis, Lavrentieva ave. 5, 630090 Novosibirsk, Russia.*

### Supporting Information

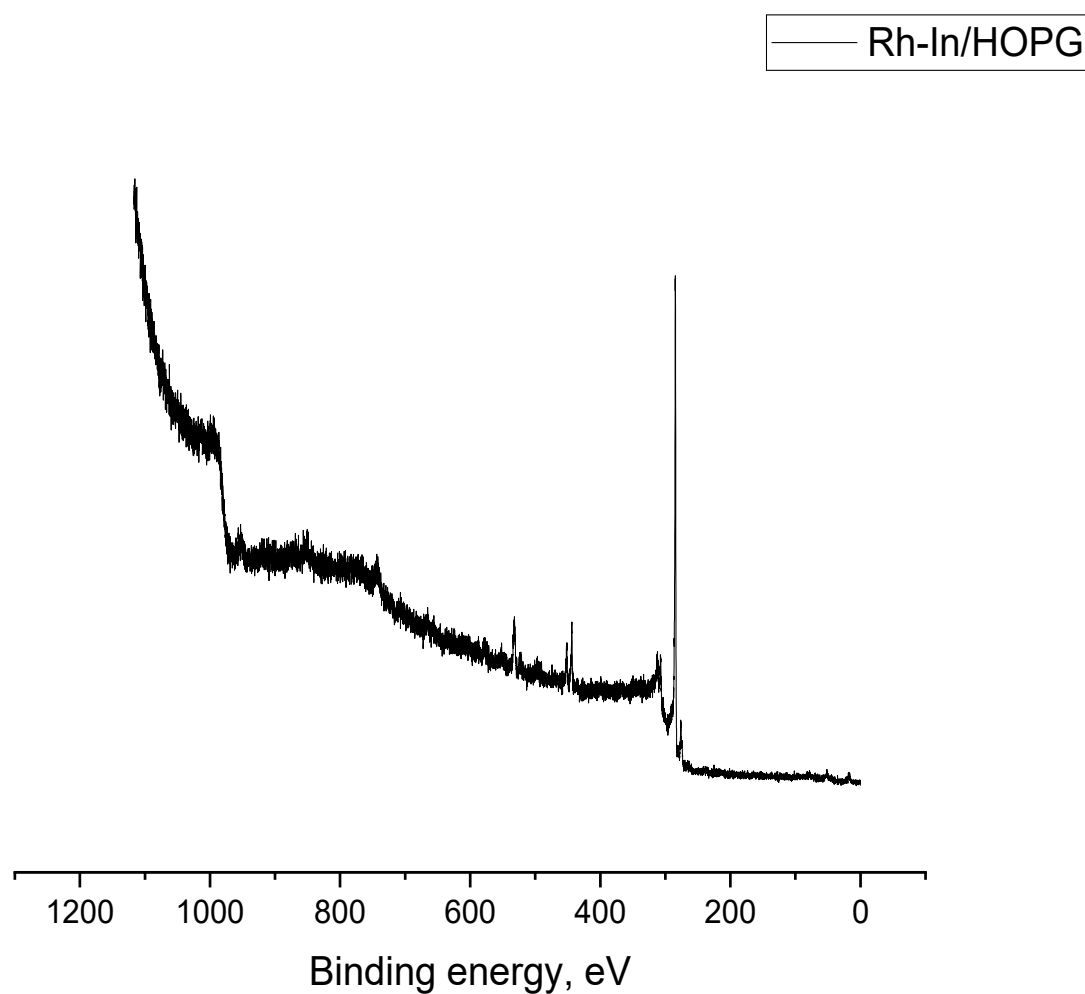

**Fig.1** Survey X-ray photoelectron spectra of the Rh-In/HOPG sample.

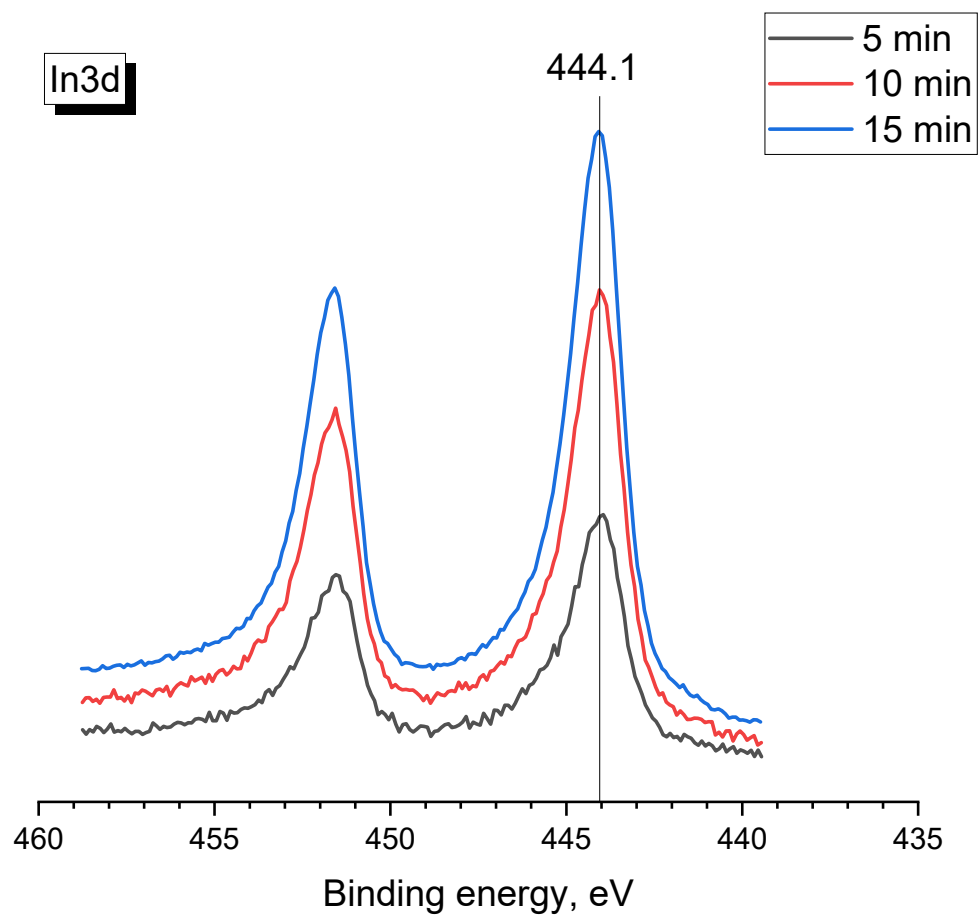

**Fig.2.** X-ray photoelectron spectra of In3d for Rh-In sample after different deposition time of indium on monometallic Rh/HOPG catalyst.

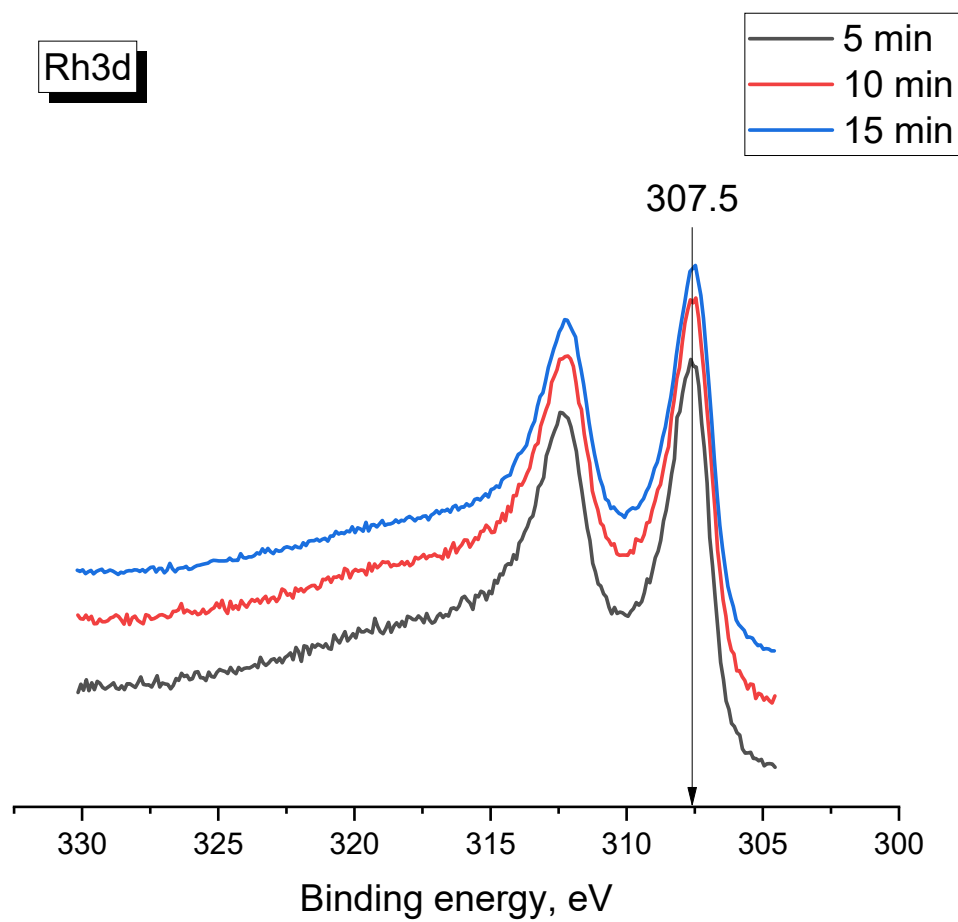

**Fig.3.** X-ray photoelectron spectra of Rh3d for Rh-In sample after different deposition time of indium on monometallic Rh/HOPG catalyst.
